# Supplementary material for: Anopheles Gambiae PRS1 Modulates Plasmodium Development at Both Midgut and Salivary Gland Steps
Source: PubMed Central journal article supplement (PMC2902509; doi:10.1371/journal.pone.0011538), 2010-07-12

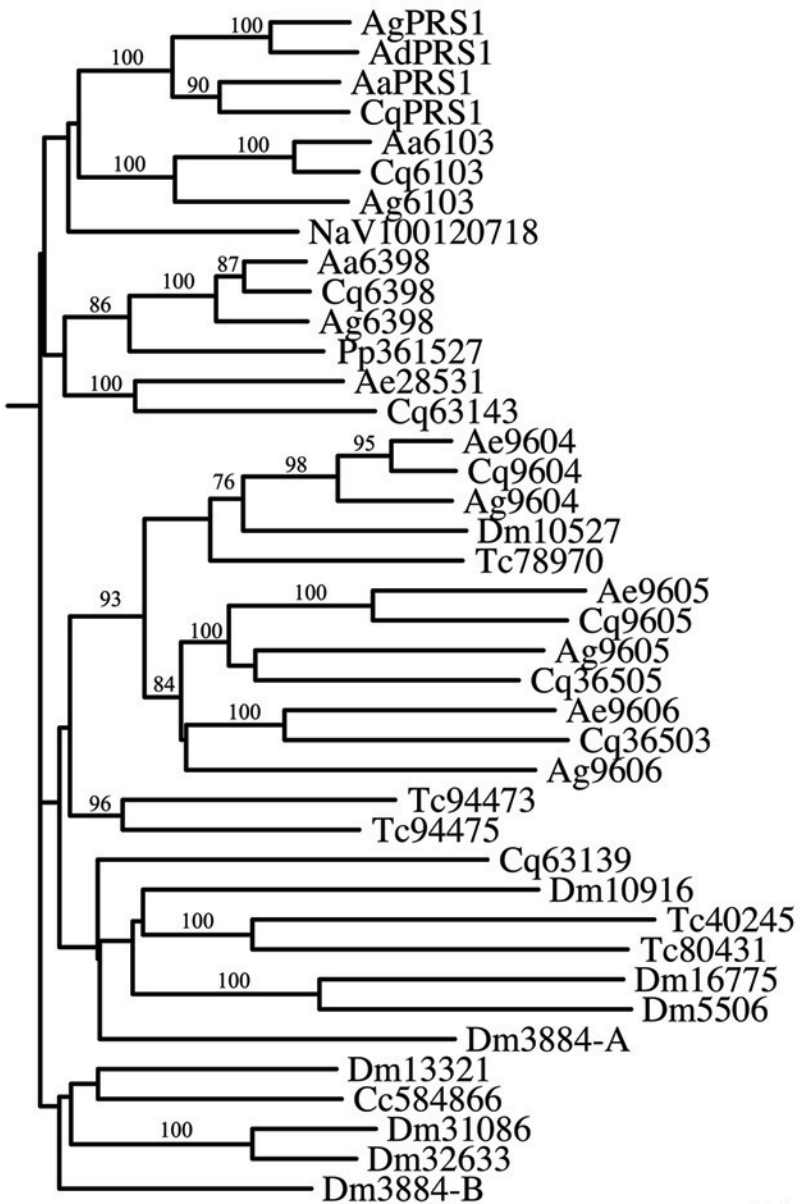

Supplement: pone.0011538.s005.pdf [file pone.0011538.s005.pdf]
